# Supplementary material
Source: publisher site journal article supplement (https://www.dovepress.com/article/210655)
Supplement: Supplementary file 1 [file get_supplementary_file.php]

Supplementary Information

**Platinum nanoparticles as** **a** **therapeutic agent against dextran sodium sulfate-induced colitis in mice**

Suqin Zhu1,2, Mingyong Zeng2, Guangxin Feng2, Haohao Wu2*

*1* *Institute of Nutrition and Health, Qingdao University, Qingdao 266021, China*

*2 College of Food Science and Engineering, Ocean University of China,* *5 Yushan Road, Qingdao, Shandong Province, 266003, China*

* Author for correspondence: [wuhaohao@ouc.edu.cn](mailto:wuhaohao@ouc.edu.cn).





**Figure S1** Design and plan of the animal experiment





**Figure S2** Rarefaction curves calculated for each sample





**Figure S3** Linear discriminant analysis (LDA) scores of the differentially abundant taxa between the normal control and the dextran sodium sulfate (DSS) control
